# Supplementary material for: Histone H3.3 beyond cancer: Germline mutations in Histone 3 Family 3A and 3B cause a previously unidentified neurodegenerative disorder in 46 patients
Source: PubMed Central journal article supplement — Sci Adv. 2020 Dec 2;6(49):eabc9207. doi: 10.1126/sciadv.abc9207 (PMC7821880; doi:10.1126/sciadv.abc9207), 2020-12-02
Supplement: abc9207_SM.pdf [file abc9207_SM.pdf]

## Supplementary Materials for

### **Histone H3.3 beyond cancer: Germline mutations in *Histone 3 Family 3A and 3B* cause a previously unidentified neurodegenerative disorder in 46 patients**

Laura Bryant, Dong Li, Samuel G. Cox, Dylan Marchione, Evan F. Joiner, Khadija Wilson, Kevin Janssen, Pearl Lee, Michael E. March, Divya Nair, Elliott Sherr, Briana Fregeau, Klaas J. Wierenga, Alexandra Wadley, Grazia M. S. Mancini, Nina Powell-Hamilton, Jiddeke van de Kamp, Theresa Grebe, John Dean, Alison Ross, Heather P. Crawford, Zoe Powis, Megan Cho, Marcia C. Willing, Linda Manwaring, Rachel Schot, Caroline Nava, Alexandra Afenjar, Davor Lessel, Matias Wagner, Thomas Klopstock, Juliane Winkelmann, Claudia B. Catarino, Kyle Retterer, Jane L. Schuette, Jeffrey W. Innis, Amy Pizzino, Sabine Lüttgen, Jonas Denecke, Tim M. Strom, Kristin G. Monaghan; DDD Study, Zuo-Fei Yuan, Holly Dubbs, Renee Bend, Jennifer A. Lee, Michael J. Lyons, Julia Hoefele, Roman Günthner, Heiko Reutter, Boris Keren, Kelly Radtke, Omar Sherbini, Cameron Mrokse, Katherine L. Helbig, Sylvie Odent, Benjamin Cogne, Sandra Mercier, Stephane Bezieau, Thomas Besnard, Sebastien Kury, Richard Redon, Karit Reinson, Monica H. Wojcik, Katrin Öunap, Pilvi Ilves, A. Micheil Innes, Kristin D. Kernohan; Care4Rare Canada Consortium, Gregory Costain, M. Stephen Meyn, David Chitayat, Elaine Zackai, Anna Lehman, Hilary Kitson; CAUSES Study, Martin G. Martin, Julian A. Martinez-Agosto; Undiagnosed Diseases Network, Stan F. Nelson, Christina G. S. Palmer, Jeanette C. Papp, Neil H. Parker, Janet S. Sinsheimer, Eric Vilain, Jijun Wan, Amanda J. Yoon, Allison Zheng, Elise Brimble, Giovanni Battista Ferrero, Francesca Clementina Radio, Diana Carli, Sabina Barresi, Alfredo Brusco, Marco Tartaglia, Jennifer Muncy Thomas, Luis Umana, Marjan M. Weiss, Garrett Gotway, K. E. Stuurman, Michelle L. Thompson, Kirsty McWalter, Constance T. R. M. Stumpel, Servi J. C. Stevens, Alexander P. A. Stegmann, Kristian Tveten, Arve Vøllo, Trine Prescott, Christina Fagerberg, Lone Walentin Laulund, Martin J. Larsen, Melissa Byler, Robert Roger Lebel, Anna C Hurst, Joy Dean, Samantha A. Schrier Vergano, Jennifer Norman, Saadet Mercimek-Andrews, Juanita Neira, Margot I. Van Allen, Nicola Longo, Elizabeth Sellars, Raymond J. Louie, Sara S. Cathey, Elly Brokamp, Delphine Heron, Molly Snyder, Adeline Vanderver, Celeste Simon, Xavier de la Cruz, Natàlia Padilla, J. Gage Crump, Wendy K. Chung, Benjamin Garcia, Hakon H. Hakonarson, Elizabeth J. Bhoj\*

\*Corresponding author. Email: bhoje@email.chop.edu

Published 2 December 2020, *Sci. Adv.* **6**, eabc9207 (2020)  
DOI: 10.1126/sciadv.abc9207

#### **The PDF file includes:**

Supplemental Authors Groups  
Figs. S1 and S2  
Legend for table S1  
Tables S2 to S5

#### **Other Supplementary Material for this manuscript includes the following:**

(available at [advances.sciencemag.org/cgi/content/full/6/49/eabc9207/DC1](https://advances.sciencemag.org/cgi/content/full/6/49/eabc9207/DC1))

Table S1

## Supplementary Materials

### Supplemental Authors Groups:

1) Care for Rare: The project was selected for analysis by the Care4Rare Consortium Gene Discovery Steering Committee consisting of Kym Boycott (lead; University of Ottawa), Alex MacKenzie (co-lead; University of Ottawa), Jacek Majewski (McGill University), Michael Brudno (University of Toronto), Dennis Bulman (University of Ottawa) and David Dymant (University of Ottawa).

2) CAUSES study: Investigators in the CAUSES Study (Clinical Assessment of the Utility of Sequencing as a Service) include Shelin Adam, Christèle du Souich, Alison M. Elliott, Anna Lehman, Jill Mwenifumbo, Tanya N. Nelson, Clara van Karnebeek, and Jan M. Friedman (PI). The bioinformatic pipeline used in part of the CAUSES study was developed in the laboratory of Wyeth Wasserman. The CAUSES project is funded by the Mining for Miracles (BCCH Foundation) and Genome British Columbia, with support from the British Columbia Provincial Health Services Authority and British Columbia Women's Hospital.

3) DDD study: The DDD study presents independent research commissioned by the Health Innovation Challenge Fund [grant number HICF-1009-003]. This study makes use of DECIPHER (<http://decipher.sanger.ac.uk>), which is funded by Wellcome. See Nature PMID: 25533962 or [www.ddduk.org/access.html](http://www.ddduk.org/access.html) for full acknowledgement.

4) UDN study: Patrick Allard, UCLA Institute for Society & Genetics; Hayk Barseghyan, Center for Genetic Medicine Research, Children's National Medical Center, Washington, DC; Manish J. Butte, Department of Pediatrics/Division of Immunology, Allergy, and Rheumatology; Department of Microbiology, Immunology, and Molecular Genetics; Esteban C. Dell'Angelica Department of Human Genetics, David Geffen School of Medicine at UCLA; Katrina M. Dipple University of Washington Department of Pediatrics, Division of Genetic Medicine; UCLA Departments of Human Genetics and Pediatrics, David Geffen School of Medicine, UCLA; Naghmeh Dorrani, Department of Pediatrics David Geffen School of Medicine at UCLA; Emilie D. Douine Department of Human Genetics, David Geffen School of Medicine, UCLA; Ascia Eskin Department of Human Genetics, David Geffen School of Medicine, UCLA; Brent L. Fogel Departments of Neurology and Human Genetics, David Geffen School of Medicine, UCLA; Matthew R. Herzog Department of Human Genetics, David Geffen School of Medicine, UCLA; Hane Lee Pathology and Laboratory Medicine, David Geffen School of Medicine, UCLA; Sandra K. Loo Semel Institute for Neuroscience and Human Behavior, Department of Psychiatry and Biobehavior, David Geffen School of Medicine, UCLA; Martin G. Martin Department of Pediatrics, Division of Gastroenterology and Nutrition, Mattel Children's Hospital; Eli and Edythe Broad Center of Regenerative Medicine and Stem Cell Research and the David Geffen School of Medicine, UCLA; Julian A. Martínez-Agosto Department of Human Genetic; Division of Medical Genetics, Department of Pediatrics, David Geffen School of Medicine, UCLA; Stan F. Nelson Department of Human Genetics; Department of Pathology and Laboratory Medicine, David Geffen School of Medicine; Christina GS. Palmer Department of Psychiatry & Biobehavioral Sciences, Department of Human Genetics, Institute for Society & Genetics, David Geffen School of Medicine, UCLA; Jeanette C. Papp Department

of Human Genetics, David Geffen School of Medicine at UCLA; H. Parker David Geffen School of Medicine; Janet S. Sinsheimer Departments of Human Genetics, Biomathematics, Biostatistics, Institute for Society and Genetics, David Geffen School of Medicine, UCLA; Eric Vilain Center for Genetic Medicine Research, Children's National Medical Center, Washington, DC; Jijun Wan Department of Human Genetics, David Geffen School of Medicine, UCLA; Amanda J. Yoon Department of Human Genetics, David Geffen School of Medicine, UCLA; Allison Zheng Department of Human Genetics, David Geffen School of Medicine, UCLA

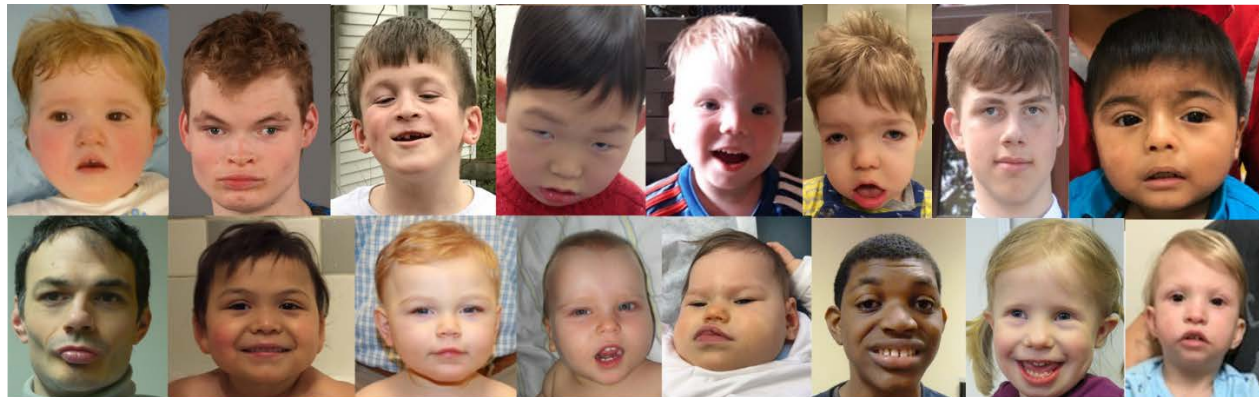

**S. Fig. 1. Patient facial features:** Although the patients are not strikingly dysmorphic, they share some features that include a broad forehead, high insertion of the columella, and deep-set almond-shaped eyes with short palpebral fissures. Photo Credits: Amy Pizzino, Children's Hospital of Philadelphia; Sarah Joy Dean, University of Alabama; Davor Lessel, University Medical Center Hamburg-Eppendorf; Constance T.R.M. Stumpel, Maastricht University Medical Center; Claudia Catarino, Ludwig-Maximilians University; Sandra Mercier, CHU Nantes; Michael J. Lyons, Greenwood Genetics Center; Julian A. Martinez-Agosto, David Geffen School of Medicine, UCLA; Elliott Sherr, UCSF; Elly Brokamp, Vanderbilt University; Katrin Õunap, Tartu University Hospital; Francesca Clementina Radio, Ospedale Pediatrico Bambino Gesù; Nina Powell-Hamilton, Alfred I. duPont Hospital for Children; K.E. Stuurman, Erasmus University Medical Center; Theresa Grebe, Phoenix Children's Hospital.

**S. Table 1. Extended phenotypic information for 46 patients with mutations in H3F3A or H3F3B**

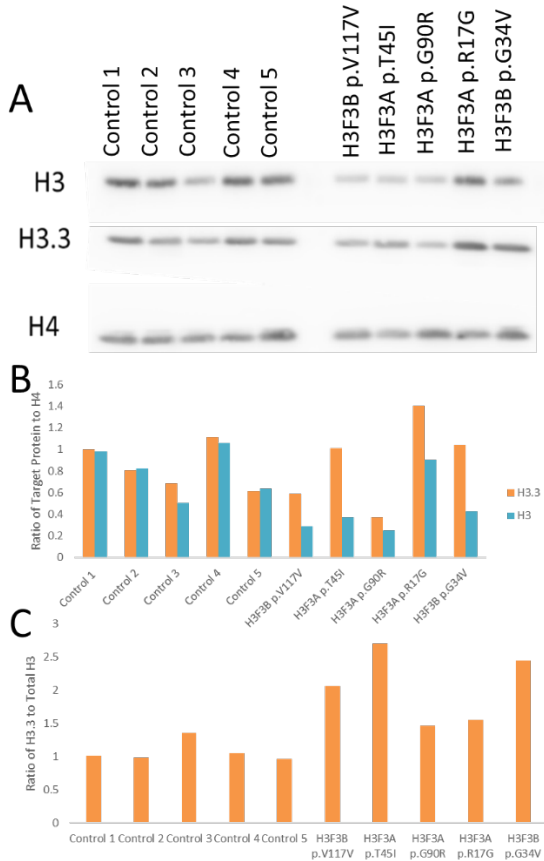

**S. Fig 2. Quantification of H3 and H3.3 protein in patients and control fibroblasts:** Western blot quantification of total H3 and H3.3 in five control and five patient samples. There is a significant difference in the ratio of H3.3 to total H3 in the patient samples compared to controls, students T-test two-tailed  $p < 0.0049$ .

| Subject ID | EB257-01a    | EB256-01a    | EB252-01a    | Control 1 | Control 2 | Control 3 |
|------------|--------------|--------------|--------------|-----------|-----------|-----------|
| Mutation   | H3F3A p.T45I | H3F3A p.G90R | H3F3A p.R16G | NA        | NA        | NA        |
| Gene       | FPKM         | FPKM         | FPKM         | FPKM      | FPKM      | FPKM      |
| HIST1H3B   | 31.93        | 69.93        | 12.77        | 19.98     | 9.62      | 8.36      |
| H3F3B      | 186.82       | 143.24       | 96.12        | 161.48    | 146.50    | 169.74    |
| H3F3A      | 29.23        | 18.09        | 17.00        | 18.36     | 17.85     | 21.94     |
| HIST1H3I   | 9.90         | 15.91        | 4.29         | 9.45      | 2.13      | 5.58      |
| HIST2H3D   | 1.17         | 0.10         | 0.00         | 0.70      | 0.00      | 0.44      |
| HIST1H3C   | 20.89        | 19.12        | 4.60         | 18.28     | 4.60      | 5.32      |
| HIST1H3E   | 10.78        | 14.43        | 2.61         | 2.71      | 2.56      | 5.00      |
| HIST1H3J   | 6.09         | 12.58        | 3.12         | 6.39      | 2.95      | 3.62      |
| HIST1H3D   | 14.06        | 4.75         | 1.50         | 12.94     | 3.42      | 5.85      |
| HIST1H3A   | 8.89         | 5.84         | 2.47         | 11.86     | 2.51      | 7.16      |
| HIST2H3C   | 0.06         | 0.00         | 0.00         | 0.08      | 0.00      | 0.00      |
| HIST1H3H   | 11.53        | 6.91         | 2.08         | 9.45      | 2.37      | 4.03      |

|                          |        |        |        |        |        |        |
|--------------------------|--------|--------|--------|--------|--------|--------|
| HIST2H3A                 | 0.03   | 0.06   | 0.02   | 0.05   | 0.02   | 0.00   |
| HIST1H3G                 | 13.55  | 29.68  | 4.87   | 6.49   | 3.62   | 7.02   |
| HIST1H3F                 | 14.15  | 17.33  | 4.33   | 2.56   | 3.08   | 3.75   |
| H3.3 expression<br>in H3 | 0.6017 | 0.4507 | 0.7262 | 0.6405 | 0.8168 | 0.7735 |

**S. Table 2. H3.3 expression representation of all histone H3 in transformed lymphoblastoid cells**

| Gene     | FPKM_Cases | FPKM_Controls | log2(FPKM_Cases/FPKM_Controls) | Test Stat | p value  | q value   |
|----------|------------|---------------|--------------------------------|-----------|----------|-----------|
| ABCB4    | 2.71579    | 1.02221       | -1.40968                       | -1.0813   | 0.03355  | 0.871071  |
| MYLIP    | 10.7263    | 3.0545        | -1.81215                       | -1.80005  | 0.00195  | 0.164984  |
| IL32     | 3.21925    | 1.46191       | -1.13888                       | -0.825863 | 0.0329   | 0.860765  |
| CD9      | 14.21      | 5.89882       | -1.26841                       | -1.34747  | 0.01855  | 0.635595  |
| ANLN     | 14.6791    | 7.20536       | -1.02662                       | -0.867304 | 0.02145  | 0.686966  |
| FHL1     | 212.104    | 100.136       | -1.08281                       | -1.6478   | 0.0018   | 0.161109  |
| TNC      | 963.341    | 256.032       | -1.91173                       | -1.06951  | 0.0061   | 0.335717  |
| CELF2    | 11.0801    | 3.03405       | -1.86865                       | -1.50379  | 0.00915  | 0.431006  |
| NEDD4L   | 6.80875    | 2.4604        | -1.4685                        | -0.763326 | 0.00785  | 0.388073  |
| PTGER3   | 8.63915    | 1.36988       | -2.65684                       | -2.02794  | 0.0008   | 0.0958085 |
| SYNE2    | 2.78524    | 1.27303       | -1.12954                       | -0.641461 | 0.00725  | 0.366945  |
| CDON     | 37.5176    | 11.4165       | -1.71644                       | -1.44337  | 0.00655  | 0.350281  |
| NTN1     | 19.4924    | 1.29198       | -3.91525                       | -3.17147  | 0.0003   | 0.04638   |
| TLE2     | 3.23608    | 1.14756       | -1.49567                       | -0.993557 | 0.01055  | 0.467222  |
| ASPM     | 4.19224    | 1.28976       | -1.70063                       | -2.34758  | 5.00E-05 | 0.0111882 |
| HMMR     | 3.73086    | 1.33873       | -1.47864                       | -1.2091   | 0.021    | 0.678311  |
| NOTCH3   | 6.54555    | 2.23461       | -1.5505                        | -0.998776 | 0.00665  | 0.352305  |
| MCM6     | 7.59809    | 3.65229       | -1.05684                       | -1.32492  | 0.0092   | 0.431006  |
| FBLN1    | 256.156    | 39.9361       | -2.68126                       | -2.69787  | 5.00E-05 | 0.0111882 |
| ITGA8    | 46.4024    | 6.65272       | -2.80218                       | -2.76786  | 5.00E-05 | 0.0111882 |
| BRINP1   | 13.392     | 3.14911       | -2.08835                       | -1.87605  | 0.0041   | 0.267144  |
| SLC1A3   | 17.2332    | 7.34608       | -1.23015                       | -0.847702 | 0.03455  | 0.890238  |
| NDC80    | 4.16526    | 1.21052       | -1.78278                       | -1.62533  | 0.00295  | 0.214392  |
| MEF2C    | 7.70317    | 2.33582       | -1.72152                       | -1.09209  | 0.0287   | 0.80275   |
| SERTAD4  | 10.9564    | 4.02799       | -1.44364                       | -1.23633  | 0.0383   | 0.933137  |
| NID2     | 39.4993    | 17.2663       | -1.19387                       | -1.14355  | 0.01665  | 0.599894  |
| AURKA    | 6.72006    | 3.27488       | -1.03703                       | -1.15701  | 0.04555  | 1         |
| TPX2     | 7.87155    | 3.10473       | -1.34218                       | -1.76257  | 0.00215  | 0.17749   |
| ARHGAP28 | 11.5165    | 2.24286       | -2.3603                        | -0.577127 | 0.0343   | 0.886483  |
| ORC6     | 3.63964    | 1.16949       | -1.63792                       | -1.46913  | 0.01615  | 0.590638  |
| CDC6     | 3.37334    | 1.25289       | -1.42892                       | -1.08608  | 0.01155  | 0.487393  |
| SCD      | 17.111     | 6.66995       | -1.35917                       | -2.20422  | 0.0002   | 0.0333451 |
| PALM     | 8.77024    | 2.16754       | -2.01656                       | -1.74363  | 0.00125  | 0.128833  |
| CDKN3    | 7.51512    | 2.95257       | -1.34782                       | -1.16245  | 0.044    | 0.992765  |
| DOK5     | 6.53522    | 1.59281       | -2.03666                       | -0.954766 | 0.0384   | 0.934235  |

|          |         |         |          |           |          |           |
|----------|---------|---------|----------|-----------|----------|-----------|
| MXRA5    | 126.27  | 33.4057 | -1.91834 | -2.77899  | 5.00E-05 | 0.0111882 |
| FGF9     | 6.75797 | 2.24504 | -1.58985 | -1.27208  | 0.0111   | 0.475483  |
| CEP152   | 2.66497 | 1.10557 | -1.26933 | -0.618197 | 0.049    | 1         |
| SFRP1    | 38.6713 | 10.2926 | -1.90966 | -2.19175  | 0.0004   | 0.0581402 |
| OLFM2    | 32.6351 | 5.06997 | -2.68637 | -1.98541  | 0.0073   | 0.368379  |
| EPHB6    | 3.53586 | 1.1329  | -1.64204 | -1.03866  | 0.0211   | 0.678311  |
| EZH2     | 3.42949 | 1.26279 | -1.44137 | -1.01979  | 0.04415  | 0.992765  |
| CXCL12   | 118.717 | 39.9319 | -1.57191 | -2.55198  | 5.00E-05 | 0.0111882 |
| SOD3     | 5.7173  | 1.69646 | -1.7528  | -1.64589  | 0.00965  | 0.442339  |
| KLF3     | 12.5286 | 5.4837  | -1.192   | -1.68168  | 0.00165  | 0.151675  |
| SLC38A1  | 33.757  | 15.6398 | -1.10996 | -1.37605  | 0.00545  | 0.312063  |
| GPR133   | 17.3579 | 7.51292 | -1.20815 | -1.00944  | 0.03     | 0.820225  |
| FBXO5    | 3.65013 | 1.74848 | -1.06185 | -1.16615  | 0.04265  | 0.984133  |
| SMOC2    | 48.7471 | 1.01311 | -5.58845 | -3.02392  | 0.0235   | 0.711105  |
| LMNB1    | 13.4172 | 4.11856 | -1.70387 | -1.4586   | 0.01705  | 0.606595  |
| SMC4     | 26.7178 | 8.91462 | -1.58356 | -0.92643  | 0.0047   | 0.288549  |
| IGFBP2   | 138.103 | 2.5526  | -5.75763 | -5.09331  | 5.00E-05 | 0.0111882 |
| IGFBP5   | 254.045 | 85.9025 | -1.56431 | -1.8381   | 0.00185  | 0.162171  |
| PRRX1    | 96.6986 | 45.7216 | -1.08062 | -0.920956 | 0.0275   | 0.779442  |
| CENPF    | 8.24794 | 2.72192 | -1.59941 | -1.55835  | 5.00E-05 | 0.0111882 |
| HELLS    | 4.27855 | 1.7888  | -1.25813 | -0.975684 | 0.0429   | 0.984558  |
| TMPO     | 33.4247 | 13.483  | -1.30977 | -1.37325  | 0.01835  | 0.635595  |
| FMOD     | 30.2375 | 14.1558 | -1.09495 | -1.71319  | 0.00195  | 0.164984  |
| HJURP    | 3.51118 | 1.21645 | -1.52928 | -1.2027   | 0.0194   | 0.652009  |
| PTGIS    | 35.698  | 13.5732 | -1.39508 | -2.04214  | 0.00015  | 0.0265719 |
| HIST1H1D | 35.868  | 9.49785 | -1.91702 | -2.59476  | 5.00E-05 | 0.0111882 |
| HIST1H3B | 38.0082 | 12.4709 | -1.60774 | -1.94961  | 0.00155  | 0.14404   |
| SOX4     | 9.88634 | 4.08245 | -1.276   | -2.03401  | 0.0005   | 0.068024  |
| MYH2     | 6.81674 | 1.04845 | -2.70083 | -2.09476  | 0.002    | 0.167547  |
| SLC25A23 | 6.42945 | 2.96757 | -1.11541 | -1.07541  | 0.02555  | 0.74021   |
| SIX1     | 4.46554 | 1.48669 | -1.58673 | -1.10534  | 0.04225  | 0.981383  |
| DLGAP5   | 4.92113 | 1.53483 | -1.68092 | -1.75201  | 0.0022   | 0.179011  |
| AKAP12   | 47.3882 | 6.8142  | -2.79791 | -4.01287  | 5.00E-05 | 0.0111882 |
| TOP2A    | 12.6753 | 3.96866 | -1.6753  | -2.23517  | 5.00E-05 | 0.0111882 |
| EMILIN2  | 11.8188 | 4.84944 | -1.28519 | -1.79637  | 0.00285  | 0.210727  |
| MYH10    | 33.9825 | 10.5738 | -1.6843  | -1.24831  | 0.0001   | 0.0195471 |
| DCLK1    | 6.3207  | 1.21938 | -2.37394 | -1.54032  | 0.0078   | 0.387856  |
| IL15RA   | 5.71876 | 1.25084 | -2.19281 | -1.69275  | 0.0005   | 0.068024  |
| SLC43A3  | 8.55979 | 4.08807 | -1.06616 | -1.06694  | 0.00525  | 0.304715  |
| ANKRD6   | 3.41412 | 1.03652 | -1.71977 | -0.713878 | 0.0304   | 0.821912  |
| PLXNC1   | 8.86646 | 2.443   | -1.85971 | -1.40006  | 0.0019   | 0.164854  |
| NOV      | 29.8702 | 10.2686 | -1.54046 | -2.01468  | 0.0006   | 0.0761463 |
| NUSAP1   | 13.184  | 3.95132 | -1.73838 | -1.61202  | 0.0033   | 0.227206  |
| KIF11    | 3.86946 | 1.34121 | -1.5286  | -1.91725  | 0.0014   | 0.135275  |
| CEP55    | 7.54321 | 2.26968 | -1.73269 | -1.72365  | 0.00175  | 0.158301  |

|                        |                    |                    |                      |                       |                    |                       |
|------------------------|--------------------|--------------------|----------------------|-----------------------|--------------------|-----------------------|
| TET1                   | 3.14577            | 1.38673            | -1.18173             | -1.33645              | 0.02335            | 0.707825              |
| SLC40A1                | 5.94987            | 1.7061             | -1.80215             | -1.78014              | 5.00E-05           | 0.0111882             |
| CENPE                  | 3.34246            | 1.54065            | -1.11737             | -0.79187              | 0.0211             | 0.678311              |
| SLC39A8                | 5.11259            | 1.68399            | -1.60217             | -0.977014             | 0.04655            | 1                     |
| HAPLN3                 | 10.4627            | 4.62702            | -1.1771              | -1.38404              | 0.02455            | 0.731377              |
| ABCA8                  | 10.7182            | 1.90968            | -2.48866             | -1.90225              | 5.00E-05           | 0.0111882             |
| SECTM1                 | 41.8511            | 15.6308            | -1.42087             | -1.39579              | 0.0135             | 0.531438              |
| DPT<br>ARHGAP2<br>6    | 387.81<br>9.43354  | 56.677<br>3.62201  | -2.77451<br>-1.38101 | -3.32539<br>-0.467542 | 5.00E-05<br>0.0247 | 0.0111882<br>0.731791 |
| SERPING1               | 20.0585            | 9.38743            | -1.09541             | -1.35148              | 0.0228             | 0.698625              |
| SESN3                  | 6.69791            | 1.85774            | -1.85016             | -1.73487              | 0.0001             | 0.0195471             |
| AKR1C2                 | 50.2423            | 18.3644            | -1.45199             | -1.59519              | 0.02065            | 0.671461              |
| ABCA9                  | 5.42894            | 1.69408            | -1.68017             | -1.09697              | 0.00145            | 0.138532              |
| GDF6                   | 4.75352            | 1.8565             | -1.35641             | -1.674                | 0.0049             | 0.296272              |
| BUB1B                  | 3.63138            | 1.51911            | -1.25729             | -0.921916             | 0.0197             | 0.656898              |
| C1R                    | 658.134            | 222.25             | -1.5662              | -1.76321              | 0.01215            | 0.503958              |
| PPAP2B                 | 282.763            | 137.683            | -1.03825             | -0.987513             | 0.04935            | 1                     |
| OLFML2B                | 14.786             | 4.09312            | -1.85296             | -1.59081              | 0.003              | 0.217098              |
| SPRY1                  | 12.1777            | 1.63366            | -2.89807             | -2.89985              | 5.00E-05           | 0.0111882             |
| ERAP2                  | 9.30427            | 1.14452            | -3.02316             | -0.887727             | 0.0153             | 0.574375              |
| PTTG1<br>KIAA1324<br>L | 19.5221<br>28.273  | 9.52055<br>5.23446 | -1.03599<br>-2.43331 | -1.29355<br>-1.66594  | 0.0259<br>0.00065  | 0.747802<br>0.0801007 |
| PHKG1                  | 6.14365            | 1.45917            | -2.07394             | -1.32352              | 0.01225            | 0.504033              |
| OSR2                   | 30.6459            | 9.91683            | -1.62775             | -1.78905              | 0.01055            | 0.467222              |
| CTHRC1                 | 77.9178            | 36.7154            | -1.08557             | -1.66612              | 0.0024             | 0.190721              |
| ABCA1                  | 19.023             | 5.55645            | -1.77551             | -1.85249              | 0.0011             | 0.119914              |
| SVEP1                  | 73.2728            | 17.7031            | -2.04928             | -2.4713               | 0.0001             | 0.0195471             |
| C10orf10               | 37.5148            | 7.81415            | -2.2633              | -2.58742              | 0.0004             | 0.0581402             |
| DACT1                  | 18.8669            | 5.88129            | -1.68165             | -2.04622              | 0.00015            | 0.0265719             |
| VSTM4                  | 32.4559            | 8.29975            | -1.96734             | -2.53206              | 0.0003             | 0.04638               |
| MFAP4                  | 86.4948            | 31.7093            | -1.44771             | -2.29694              | 5.00E-05           | 0.0111882             |
| PLK1                   | 3.6376             | 1.27442            | -1.51314             | -1.14882              | 0.01545            | 0.577456              |
| TNXB                   | 17.5193            | 5.11974            | -1.7748              | -1.76542              | 0.031              | 0.830246              |
| TM4SF20                | 4.06696            | 1.11666            | -1.86477             | -1.39583              | 0.007              | 0.362933              |
| BUB1                   | 4.6818             | 2.04894            | -1.19218             | -1.05789              | 0.01605            | 0.589517              |
| CDK1                   | 6.32417            | 2.05579            | -1.62118             | -1.61787              | 0.0015             | 0.140934              |
| PDGFD                  | 51.7081            | 15.1145            | -1.77446             | -1.67537              | 0.0032             | 0.224873              |
| SHCBP1                 | 3.24326            | 1.16799            | -1.47342             | -1.10359              | 0.00415            | 0.268346              |
| RRM2                   | 9.46553            | 1.84715            | -2.35738             | -1.96111              | 5.00E-05           | 0.0111882             |
| ID4                    | 12.0953            | 5.93406            | -1.02736             | -1.36767              | 0.02205            | 0.690869              |
| PODN                   | 41.5325            | 19.7258            | -1.07415             | -1.36162              | 0.01665            | 0.599894              |
| UBE2C<br>MARCKSL<br>1  | 8.24535<br>4.00351 | 3.11132<br>1.6819  | -1.40606<br>-1.25117 | -1.30736<br>-1.32467  | 0.0216<br>0.0184   | 0.689174<br>0.635595  |
| MAF                    | 2.85663            | 1.19995            | -1.25134             | -1.14991              | 0.02085            | 0.67667               |

|                               |         |         |          |           |          |           |
|-------------------------------|---------|---------|----------|-----------|----------|-----------|
| RMI1                          | 4.34801 | 1.5654  | -1.47383 | -1.39156  | 0.0218   | 0.690374  |
| AURKB                         | 2.98817 | 1.1776  | -1.34342 | -0.9925   | 0.02215  | 0.691161  |
| CDC42EP4                      | 9.68249 | 4.6437  | -1.0601  | -1.351    | 0.01435  | 0.549631  |
| KCNA4                         | 4.91449 | 1.64195 | -1.58164 | -1.0568   | 0.01865  | 0.635595  |
| AP1S2                         | 38.9648 | 16.2021 | -1.26599 | -1.27809  | 0.0176   | 0.622257  |
| NDN                           | 12.6343 | 1.66144 | -2.92683 | -3.2094   | 5.00E-05 | 0.0111882 |
| IQGAP3                        | 2.58405 | 1.06771 | -1.27512 | -1.37521  | 0.00935  | 0.436703  |
| HIST1H1B                      | 35.3672 | 16.1795 | -1.12824 | -1.58787  | 0.00705  | 0.36331   |
| OLFML2A                       | 3.29172 | 1.06199 | -1.63206 | -1.71665  | 0.00185  | 0.162171  |
| COL14A1                       | 10.5635 | 1.91587 | -2.46302 | -2.2406   | 0.00185  | 0.162171  |
| COL4A5                        | 9.9059  | 3.53191 | -1.48784 | -0.858739 | 0.0105   | 0.467222  |
| APOD                          | 10.2873 | 1.05477 | -3.28586 | -2.69264  | 0.0001   | 0.0195471 |
| PLAC9                         | 33.4639 | 10.694  | -1.6458  | -1.75645  | 0.00945  | 0.436703  |
| HIST1H2B<br>O                 | 14.9054 | 5.49446 | -1.43979 | -1.49954  | 0.0109   | 0.475296  |
| HIST1H2B<br>M                 | 8.10544 | 2.62633 | -1.62584 | -1.4442   | 0.0179   | 0.627644  |
| MME                           | 109.131 | 52.7323 | -1.0493  | -1.03282  | 0.02055  | 0.670774  |
| ADH1B                         | 10.4111 | 3.68612 | -1.49795 | -1.50956  | 0.02565  | 0.741843  |
| HIST1H2A<br>G                 | 4.60773 | 2.20996 | -1.06003 | -1.28025  | 0.0284   | 0.798298  |
| HIST1H3E<br>HIST1H2B<br>H     | 9.20726 | 3.36938 | -1.45029 | -1.31834  | 0.03025  | 0.821776  |
| MFAP5                         | 438.269 | 169.812 | -1.36788 | -1.4002   | 0.0033   | 0.227206  |
| HIST1H2B<br>F                 | 3.6127  | 1.34821 | -1.42203 | -1.3791   | 0.0186   | 0.635595  |
| MBP                           | 10.2671 | 4.16351 | -1.30216 | -0.906753 | 0.02555  | 0.74021   |
| HIST1H4F<br>HIST1H2A<br>L     | 18.2413 | 7.80628 | -1.2245  | -1.3244   | 0.0246   | 0.731377  |
| PRC1                          | 13.9259 | 6.22368 | -1.16193 | -1.29162  | 0.00195  | 0.164984  |
| TGM2                          | 7.69583 | 3.24958 | -1.24382 | -1.5598   | 0.0095   | 0.437824  |
| CENPW<br>CRHR1-<br>IT1        | 5.84658 | 2.02791 | -1.5276  | -1.36371  | 0.0227   | 0.698625  |
| RANBP17                       | 11.9423 | 2.12939 | -2.48757 | -1.7866   | 5.00E-05 | 0.0111882 |
| RANBP17                       | 7.62502 | 3.13513 | -1.28222 | -0.596036 | 0.0364   | 0.908813  |
| RNVU1-14                      | 26.5967 | 9.28833 | -1.51775 | -1.2046   | 0.03605  | 0.908813  |
| DIO2<br>RP11-<br>632K20.7     | 17.9267 | 1.56905 | -3.51414 | -1.85558  | 5.00E-05 | 0.0111882 |
| MIR503HG<br>RP11-<br>481H12.1 | 9.38727 | 2.38537 | -1.97649 | -1.12011  | 0.0206   | 0.671118  |
| MIR503HG<br>RP11-<br>481H12.1 | 11.5052 | 5.34632 | -1.10567 | -0.977593 | 0.03125  | 0.832974  |
| KIFC1<br>hsa-mir-<br>6723     | 5.74143 | 1.89808 | -1.59687 | -1.22672  | 0.0486   | 1         |
| KIFC1<br>hsa-mir-<br>6723     | 3.09675 | 1.02093 | -1.60087 | -1.25908  | 0.0085   | 0.413003  |
| AQP1                          | 11.8814 | 3.90207 | -1.60639 | -1.56855  | 0.0168   | 0.601475  |
| AQP1                          | 168.924 | 6.45651 | -4.70947 | -4.32398  | 0.00865  | 0.415542  |
| SEPP1<br>RP11-<br>760H22.2    | 26.2142 | 6.87315 | -1.93131 | -1.81318  | 0.02365  | 0.714373  |
| SEPP1<br>RP11-<br>760H22.2    | 4.63262 | 1.87826 | -1.30243 | -1.2103   | 0.004    | 0.261631  |
| HIST1H3G                      | 15.9485 | 5.62572 | -1.50331 | -1.57429  | 0.00785  | 0.388073  |



**S. Table 3. Upregulated expression of genes in cases with at least 2-fold change in fibroblast cells**

Supplemental Table 4. Enrichment analysis of upregulated genes in cases in fibroblast cells

| GO Biological Process Term                                | Gene Count | Percentage | P Value  | Benjamini-Hochberg Adjusted P Value |
|-----------------------------------------------------------|------------|------------|----------|-------------------------------------|
| mitotic cell cycle process                                | 40         | 0.2        | 2.30E-17 | 7.80E-14                            |
| mitotic cell cycle                                        | 41         | 0.2        | 6.10E-17 | 1.90E-13                            |
| mitotic nuclear division                                  | 25         | 0.1        | 5.20E-13 | 5.80E-10                            |
| cell division                                             | 28         | 0.1        | 8.90E-13 | 7.50E-10                            |
| cellular component organization                           | 97         | 0.4        | 1.60E-12 | 1.00E-09                            |
| DNA packaging                                             | 18         | 0.1        | 3.20E-12 | 1.80E-09                            |
| mitotic cell cycle phase transition                       | 26         | 0.1        | 3.20E-12 | 1.60E-09                            |
| cell cycle process                                        | 41         | 0.2        | 5.00E-12 | 2.10E-09                            |
| chromosome organization                                   | 38         | 0.2        | 7.10E-12 | 2.70E-09                            |
| cellular component organization or biogenesis             | 97         | 0.4        | 8.40E-12 | 2.80E-09                            |
| cell proliferation                                        | 48         | 0.2        | 9.40E-12 | 2.90E-09                            |
| cell cycle phase transition                               | 26         | 0.1        | 1.20E-11 | 3.50E-09                            |
| mitotic sister chromatid segregation                      | 15         | 0.1        | 2.80E-11 | 7.20E-09                            |
| nuclear division                                          | 26         | 0.1        | 4.90E-11 | 1.20E-08                            |
| DNA conformation change                                   | 19         | 0.1        | 6.40E-11 | 1.40E-08                            |
| chromosome segregation                                    | 20         | 0.1        | 1.20E-10 | 2.50E-08                            |
| organelle fission                                         | 26         | 0.1        | 1.90E-10 | 3.80E-08                            |
| cell cycle                                                | 43         | 0.2        | 2.10E-10 | 3.90E-08                            |
| regulation of mitotic nuclear division                    | 14         | 0.1        | 3.10E-10 | 5.60E-08                            |
| sister chromatid segregation                              | 16         | 0.1        | 1.30E-09 | 2.20E-07                            |
| regulation of mitotic cell cycle                          | 22         | 0.1        | 2.10E-09 | 3.40E-07                            |
| regulation of nuclear division                            | 14         | 0.1        | 2.20E-09 | 3.40E-07                            |
| protein-DNA complex assembly                              | 16         | 0.1        | 2.50E-09 | 3.70E-07                            |
| chromatin assembly                                        | 14         | 0.1        | 2.80E-09 | 3.90E-07                            |
| nuclear chromosome segregation                            | 17         | 0.1        | 5.00E-09 | 6.80E-07                            |
| regulation of mitotic metaphase/anaphase transition       | 9          | 0          | 7.10E-09 | 9.20E-07                            |
| regulation of metaphase/anaphase transition of cell cycle | 9          | 0          | 8.40E-09 | 1.10E-06                            |
| nucleosome assembly                                       | 13         | 0.1        | 9.20E-09 | 1.10E-06                            |
| regulation of mitotic sister chromatid separation         | 9          | 0          | 1.00E-08 | 1.20E-06                            |
| protein-DNA complex subunit organization                  | 16         | 0.1        | 1.10E-08 | 1.20E-06                            |
| metaphase/anaphase transition of cell cycle               | 9          | 0          | 1.20E-08 | 1.30E-06                            |
| mitotic sister chromatid separation                       | 9          | 0          | 1.40E-08 | 1.50E-06                            |
| regulation of cell proliferation                          | 38         | 0.2        | 1.40E-08 | 1.40E-06                            |
| chromatin assembly or disassembly                         | 14         | 0.1        | 1.40E-08 | 1.40E-06                            |
| chromosome separation                                     | 10         | 0          | 1.50E-08 | 1.50E-06                            |
| regulation of mitotic cell cycle phase transition         | 17         | 0.1        | 1.60E-08 | 1.50E-06                            |
| positive regulation of cell proliferation                 | 27         | 0.1        | 2.40E-08 | 2.20E-06                            |
| regulation of mitotic sister chromatid segregation        | 9          | 0          | 3.00E-08 | 2.70E-06                            |
| regulation of cell cycle phase transition                 | 17         | 0.1        | 4.60E-08 | 4.00E-06                            |
| regulation of chromosome segregation                      | 10         | 0          | 5.30E-08 | 4.40E-06                            |
| nucleosome organization                                   | 13         | 0.1        | 5.80E-08 | 4.80E-06                            |
| regulation of cell cycle process                          | 22         | 0.1        | 6.00E-08 | 4.80E-06                            |
| negative regulation of biological process                 | 72         | 0.3        | 8.60E-08 | 6.80E-06                            |
| G1/S transition of mitotic cell cycle                     | 14         | 0.1        | 9.30E-08 | 7.10E-06                            |
| regulation of sister chromatid segregation                | 9          | 0          | 1.30E-07 | 9.50E-06                            |
| negative regulation of cellular process                   | 68         | 0.3        | 1.60E-07 | 1.20E-05                            |
| cell cycle G1/S phase transition                          | 14         | 0.1        | 2.50E-07 | 1.80E-05                            |
| positive regulation of biological process                 | 77         | 0.3        | 3.60E-07 | 2.50E-05                            |

|                                                                         |    |     |          |          |
|-------------------------------------------------------------------------|----|-----|----------|----------|
| negative regulation of mitotic cell cycle                               | 13 | 0.1 | 5.50E-07 | 3.80E-05 |
| cellular component assembly                                             | 48 | 0.2 | 6.40E-07 | 4.30E-05 |
| developmental growth                                                    | 20 | 0.1 | 9.10E-07 | 6.00E-05 |
| negative regulation of mitotic cell cycle phase transition              | 11 | 0   | 1.10E-06 | 7.00E-05 |
| single-organism organelle organization                                  | 35 | 0.2 | 1.10E-06 | 7.20E-05 |
| negative regulation of cellular metabolic process                       | 44 | 0.2 | 1.30E-06 | 8.30E-05 |
| regulation of cell cycle                                                | 26 | 0.1 | 1.30E-06 | 8.20E-05 |
| negative regulation of cell cycle process                               | 13 | 0.1 | 1.50E-06 | 8.70E-05 |
| growth                                                                  | 25 | 0.1 | 2.10E-06 | 1.20E-04 |
| negative regulation of cell cycle phase transition                      | 11 | 0   | 2.10E-06 | 1.20E-04 |
| negative regulation of macromolecule metabolic process                  | 43 | 0.2 | 2.80E-06 | 1.60E-04 |
| negative regulation of gene expression, epigenetic                      | 10 | 0   | 3.30E-06 | 1.80E-04 |
| negative regulation of metabolic process                                | 45 | 0.2 | 3.70E-06 | 2.00E-04 |
| negative regulation of cell cycle                                       | 17 | 0.1 | 4.00E-06 | 2.20E-04 |
| urogenital system development                                           | 14 | 0.1 | 5.20E-06 | 2.80E-04 |
| negative regulation of transcription, DNA-templated                     | 27 | 0.1 | 5.70E-06 | 3.00E-04 |
| spindle organization                                                    | 9  | 0   | 5.80E-06 | 3.00E-04 |
| organelle organization                                                  | 58 | 0.3 | 6.20E-06 | 3.20E-04 |
| regulation of cellular component organization                           | 42 | 0.2 | 6.80E-06 | 3.40E-04 |
| cytoskeleton organization                                               | 27 | 0.1 | 7.20E-06 | 3.50E-04 |
| extracellular matrix organization                                       | 14 | 0.1 | 8.30E-06 | 4.00E-04 |
| extracellular structure organization                                    | 14 | 0.1 | 8.50E-06 | 4.10E-04 |
| regulation of neuron differentiation                                    | 18 | 0.1 | 9.10E-06 | 4.30E-04 |
| muscle cell proliferation                                               | 10 | 0   | 9.50E-06 | 4.40E-04 |
| chromatin silencing                                                     | 9  | 0   | 1.00E-05 | 4.80E-04 |
| negative regulation of cellular macromolecule biosynthetic process      | 29 | 0.1 | 1.20E-05 | 5.30E-04 |
| negative regulation of nucleic acid-templated transcription             | 27 | 0.1 | 1.20E-05 | 5.30E-04 |
| negative regulation of cellular biosynthetic process                    | 31 | 0.1 | 1.20E-05 | 5.40E-04 |
| regulation of developmental process                                     | 39 | 0.2 | 1.30E-05 | 5.60E-04 |
| cellular component biogenesis                                           | 48 | 0.2 | 1.30E-05 | 5.60E-04 |
| chromatin organization                                                  | 21 | 0.1 | 1.40E-05 | 5.80E-04 |
| developmental growth involved in morphogenesis                          | 11 | 0   | 1.40E-05 | 5.90E-04 |
| spindle assembly                                                        | 8  | 0   | 1.50E-05 | 6.00E-04 |
| negative regulation of RNA biosynthetic process                         | 27 | 0.1 | 1.50E-05 | 6.20E-04 |
| negative regulation of biosynthetic process                             | 31 | 0.1 | 1.70E-05 | 6.80E-04 |
| negative regulation of nitrogen compound metabolic process              | 31 | 0.1 | 1.70E-05 | 6.90E-04 |
| nervous system development                                              | 39 | 0.2 | 2.00E-05 | 7.80E-04 |
| negative regulation of nucleobase-containing compound metabolic process | 29 | 0.1 | 2.20E-05 | 8.60E-04 |
| spindle checkpoint                                                      | 6  | 0   | 2.20E-05 | 8.70E-04 |
| neuron differentiation                                                  | 27 | 0.1 | 2.40E-05 | 9.20E-04 |
| cell adhesion                                                           | 33 | 0.1 | 2.60E-05 | 9.90E-04 |
| biological adhesion                                                     | 33 | 0.1 | 2.80E-05 | 1.00E-03 |
| cytoskeleton-dependent cytokinesis                                      | 6  | 0   | 2.90E-05 | 1.10E-03 |
| negative regulation of RNA metabolic process                            | 27 | 0.1 | 2.90E-05 | 1.10E-03 |
| regulation of neurogenesis                                              | 19 | 0.1 | 3.20E-05 | 1.20E-03 |
| protein heterotetramerization                                           | 6  | 0   | 3.30E-05 | 1.20E-03 |
| metaphase/anaphase transition of mitotic cell cycle                     | 6  | 0   | 3.30E-05 | 1.20E-03 |
| negative regulation of gene expression                                  | 30 | 0.1 | 3.50E-05 | 1.20E-03 |
| cell cycle checkpoint                                                   | 11 | 0   | 3.60E-05 | 1.30E-03 |

|                                                                                  |     |     |          |          |
|----------------------------------------------------------------------------------|-----|-----|----------|----------|
| negative regulation of macromolecule biosynthetic process                        | 29  | 0.1 | 4.00E-05 | 1.40E-03 |
| regulation of chromosome organization                                            | 12  | 0.1 | 5.00E-05 | 1.70E-03 |
| generation of neurons                                                            | 28  | 0.1 | 5.00E-05 | 1.70E-03 |
| single-organism cellular process                                                 | 129 | 0.6 | 5.80E-05 | 1.90E-03 |
| neurogenesis                                                                     | 29  | 0.1 | 5.80E-05 | 1.90E-03 |
| regulation of cell development                                                   | 21  | 0.1 | 5.80E-05 | 1.90E-03 |
| anaphase-promoting complex-dependent catabolic process                           | 7   | 0   | 6.90E-05 | 2.30E-03 |
| mitotic spindle assembly checkpoint                                              | 5   | 0   | 7.40E-05 | 2.40E-03 |
| regulation of multicellular organismal process                                   | 43  | 0.2 | 7.50E-05 | 2.40E-03 |
| mitotic cell cycle checkpoint                                                    | 9   | 0   | 8.30E-05 | 2.60E-03 |
| regulation of multicellular organismal development                               | 32  | 0.1 | 8.40E-05 | 2.60E-03 |
| spindle assembly checkpoint                                                      | 5   | 0   | 8.70E-05 | 2.70E-03 |
| single-multicellular organism process                                            | 76  | 0.3 | 9.20E-05 | 2.80E-03 |
| cytokinesis                                                                      | 8   | 0   | 9.30E-05 | 2.80E-03 |
| microtubule cytoskeleton organization                                            | 14  | 0.1 | 1.10E-04 | 3.30E-03 |
| centromere complex assembly                                                      | 6   | 0   | 1.10E-04 | 3.30E-03 |
| cellular response to acid chemical                                               | 9   | 0   | 1.10E-04 | 3.30E-03 |
| tissue development                                                               | 32  | 0.1 | 1.20E-04 | 3.60E-03 |
| positive regulation of cellular process                                          | 64  | 0.3 | 1.30E-04 | 3.70E-03 |
| kidney development                                                               | 11  | 0   | 1.30E-04 | 3.80E-03 |
| negative regulation of nuclear division                                          | 6   | 0   | 1.30E-04 | 3.80E-03 |
| regulation of nervous system development                                         | 19  | 0.1 | 1.50E-04 | 4.20E-03 |
| protein ubiquitination involved in ubiquitin-dependent protein catabolic process | 10  | 0   | 1.60E-04 | 4.40E-03 |
| organ morphogenesis                                                              | 22  | 0.1 | 1.60E-04 | 4.60E-03 |
| multicellular organismal process                                                 | 85  | 0.4 | 1.70E-04 | 4.80E-03 |
| DNA replication-dependent nucleosome organization                                | 5   | 0   | 1.70E-04 | 4.70E-03 |
| DNA replication-dependent nucleosome assembly                                    | 5   | 0   | 1.70E-04 | 4.70E-03 |
| regulation of cell differentiation                                               | 29  | 0.1 | 1.80E-04 | 4.80E-03 |
| response to acid chemical                                                        | 11  | 0   | 1.80E-04 | 4.90E-03 |
| protein localization to chromosome                                               | 6   | 0   | 1.80E-04 | 4.90E-03 |
| cellular macromolecular complex assembly                                         | 22  | 0.1 | 1.90E-04 | 5.20E-03 |
| mitotic cytokinesis                                                              | 5   | 0   | 1.90E-04 | 5.10E-03 |
| mitotic spindle checkpoint                                                       | 5   | 0   | 1.90E-04 | 5.10E-03 |
| negative regulation of mitotic sister chromatid separation                       | 5   | 0   | 1.90E-04 | 5.10E-03 |
| negative regulation of mitotic metaphase/anaphase transition                     | 5   | 0   | 1.90E-04 | 5.10E-03 |
| response to wounding                                                             | 17  | 0.1 | 2.00E-04 | 5.20E-03 |
| renal system development                                                         | 11  | 0   | 2.10E-04 | 5.40E-03 |
| negative regulation of metaphase/anaphase transition of cell cycle               | 5   | 0   | 2.20E-04 | 5.70E-03 |
| kinetochore organization                                                         | 4   | 0   | 2.30E-04 | 5.80E-03 |
| regulation of biological quality                                                 | 51  | 0.2 | 2.30E-04 | 5.90E-03 |
| negative regulation of mitotic sister chromatid segregation                      | 5   | 0   | 2.50E-04 | 6.20E-03 |
| neuron projection extension                                                      | 8   | 0   | 2.50E-04 | 6.30E-03 |
| anatomical structure morphogenesis                                               | 41  | 0.2 | 2.70E-04 | 6.80E-03 |
| single-organism process                                                          | 135 | 0.6 | 2.80E-04 | 6.90E-03 |
| protein complex subunit organization                                             | 30  | 0.1 | 2.90E-04 | 7.10E-03 |
| macromolecular complex subunit organization                                      | 39  | 0.2 | 3.00E-04 | 7.30E-03 |
| negative regulation of sister chromatid segregation                              | 5   | 0   | 3.10E-04 | 7.40E-03 |
| system development                                                               | 58  | 0.3 | 3.40E-04 | 8.10E-03 |
| negative regulation of chromosome segregation                                    | 5   | 0   | 3.40E-04 | 8.10E-03 |
| developmental process                                                            | 71  | 0.3 | 3.40E-04 | 8.10E-03 |
| animal organ development                                                         | 46  | 0.2 | 3.50E-04 | 8.30E-03 |
| establishment of chromosome localization                                         | 6   | 0   | 3.50E-04 | 8.30E-03 |

|                                                                               |     |     |          |          |
|-------------------------------------------------------------------------------|-----|-----|----------|----------|
| microtubule-based process                                                     | 16  | 0.1 | 3.70E-04 | 8.60E-03 |
| chromatin silencing at rDNA                                                   | 5   | 0   | 3.70E-04 | 8.60E-03 |
| central nervous system development                                            | 20  | 0.1 | 3.80E-04 | 8.60E-03 |
| chromosome localization                                                       | 6   | 0   | 3.80E-04 | 8.60E-03 |
| mitotic spindle organization                                                  | 5   | 0   | 4.10E-04 | 9.30E-03 |
| cell development                                                              | 33  | 0.1 | 4.10E-04 | 9.30E-03 |
| regulation of intracellular signal transduction                               | 30  | 0.1 | 4.30E-04 | 9.50E-03 |
| single-organism developmental process                                         | 69  | 0.3 | 4.70E-04 | 1.00E-02 |
| ear morphogenesis                                                             | 7   | 0   | 5.20E-04 | 1.10E-02 |
| multicellular organism development                                            | 63  | 0.3 | 5.40E-04 | 1.20E-02 |
| regulation of gene expression, epigenetic                                     | 10  | 0   | 5.50E-04 | 1.20E-02 |
| positive regulation of developmental process                                  | 22  | 0.1 | 5.70E-04 | 1.20E-02 |
| regulation of signal transduction                                             | 41  | 0.2 | 5.80E-04 | 1.20E-02 |
| negative regulation of mitotic nuclear division                               | 5   | 0   | 6.00E-04 | 1.30E-02 |
| head development                                                              | 17  | 0.1 | 6.20E-04 | 1.30E-02 |
| regulation of muscle tissue development                                       | 7   | 0   | 6.50E-04 | 1.40E-02 |
| positive regulation of gene expression, epigenetic                            | 6   | 0   | 6.60E-04 | 1.40E-02 |
| positive regulation of macromolecule metabolic process                        | 42  | 0.2 | 7.40E-04 | 1.50E-02 |
| positive regulation of metabolic process                                      | 44  | 0.2 | 7.80E-04 | 1.60E-02 |
| positive regulation of mitotic cell cycle                                     | 7   | 0   | 8.10E-04 | 1.60E-02 |
| protein complex assembly                                                      | 26  | 0.1 | 8.20E-04 | 1.70E-02 |
| protein complex biogenesis                                                    | 26  | 0.1 | 8.30E-04 | 1.70E-02 |
| anatomical structure development                                              | 68  | 0.3 | 8.30E-04 | 1.70E-02 |
| metaphase plate congression                                                   | 5   | 0   | 8.30E-04 | 1.70E-02 |
| movement of cell or subcellular component                                     | 30  | 0.1 | 9.00E-04 | 1.80E-02 |
| macromolecular complex assembly                                               | 29  | 0.1 | 9.20E-04 | 1.80E-02 |
| neuron migration                                                              | 7   | 0   | 9.50E-04 | 1.90E-02 |
| sister chromatid cohesion                                                     | 7   | 0   | 9.50E-04 | 1.90E-02 |
| regulation of protein binding                                                 | 8   | 0   | 1.00E-03 | 2.00E-02 |
| wound healing                                                                 | 14  | 0.1 | 1.00E-03 | 2.00E-02 |
| brain development                                                             | 16  | 0.1 | 1.10E-03 | 2.00E-02 |
| regulation of biological process                                              | 115 | 0.5 | 1.10E-03 | 2.00E-02 |
| regulation of organelle organization                                          | 22  | 0.1 | 1.20E-03 | 2.20E-02 |
| connective tissue development                                                 | 9   | 0   | 1.20E-03 | 2.20E-02 |
| organelle localization                                                        | 13  | 0.1 | 1.30E-03 | 2.50E-02 |
| regulation of canonical Wnt signaling pathway                                 | 9   | 0   | 1.30E-03 | 2.50E-02 |
| regulation of binding                                                         | 10  | 0   | 1.40E-03 | 2.60E-02 |
| developmental cell growth                                                     | 8   | 0   | 1.40E-03 | 2.60E-02 |
| inner ear morphogenesis                                                       | 6   | 0   | 1.50E-03 | 2.70E-02 |
| regulation of cellular process                                                | 111 | 0.5 | 1.50E-03 | 2.60E-02 |
| regulation of G1/S transition of mitotic cell cycle                           | 7   | 0   | 1.60E-03 | 2.80E-02 |
| spindle assembly involved in meiosis                                          | 3   | 0   | 1.60E-03 | 2.80E-02 |
| negative regulation of G1/S transition of mitotic cell cycle                  | 6   | 0   | 1.60E-03 | 2.90E-02 |
| regulation of transcription involved in G1/S transition of mitotic cell cycle | 4   | 0   | 1.70E-03 | 3.00E-02 |
| cell growth                                                                   | 12  | 0.1 | 1.70E-03 | 3.00E-02 |
| positive regulation of cell cycle process                                     | 9   | 0   | 1.70E-03 | 3.10E-02 |
| cell cycle G2/M phase transition                                              | 8   | 0   | 1.80E-03 | 3.20E-02 |
| gene silencing                                                                | 9   | 0   | 1.80E-03 | 3.20E-02 |
| regulation of growth                                                          | 15  | 0.1 | 1.90E-03 | 3.30E-02 |
| organelle assembly                                                            | 15  | 0.1 | 1.90E-03 | 3.30E-02 |
| negative regulation of cell cycle G1/S phase transition                       | 6   | 0   | 1.90E-03 | 3.30E-02 |
| positive regulation of protein catabolic process                              | 9   | 0   | 2.00E-03 | 3.40E-02 |
| regulation of gene silencing                                                  | 5   | 0   | 2.00E-03 | 3.50E-02 |
| ear development                                                               | 8   | 0   | 2.20E-03 | 3.70E-02 |
| regulation of cell communication                                              | 42  | 0.2 | 2.20E-03 | 3.70E-02 |
| morphogenesis of an epithelium                                                | 13  | 0.1 | 2.20E-03 | 3.70E-02 |

|                                                  |    |     |          |          |
|--------------------------------------------------|----|-----|----------|----------|
| regulation of anatomical structure morphogenesis | 20 | 0.1 | 2.20E-03 | 3.70E-02 |
| regulation of cell cycle G1/S phase transition   | 7  | 0   | 2.40E-03 | 3.90E-02 |
| axon extension                                   | 6  | 0   | 2.50E-03 | 4.00E-02 |
| response to retinoic acid                        | 6  | 0   | 2.50E-03 | 4.00E-02 |
| negative regulation of chromosome organization   | 6  | 0   | 2.80E-03 | 4.50E-02 |
| smooth muscle cell proliferation                 | 6  | 0   | 2.80E-03 | 4.50E-02 |
| regulation of signaling                          | 42 | 0.2 | 3.10E-03 | 4.90E-02 |

**S. Table 4. Enrichment analysis of upregulated expression of genes in patients in fibroblast cells**

| PDB code | Gene Symbol of the histone binding partner (except for nucleosome) | Histone state (modified or not, or with a mutated residue) |
|----------|--------------------------------------------------------------------|------------------------------------------------------------|
| 3AV2     | FULL NUCLEOSOME                                                    | H3.3                                                       |
| 3JVK     | Brd4                                                               | H3.3-K(ac)14                                               |
| 3MUK     | Brd4                                                               | H3.3-K(prop)23                                             |
| 4GNF     | NSD3                                                               | UNMODIFIED                                                 |
| 4GUS     | KDM1B                                                              | K4 replaced by a Met, mimic H3K4me2                        |
| 4N4I     | Zmynd11                                                            | H3.3K36me3                                                 |
| 4QQ4     | MORC3                                                              | H3.3K4me3                                                  |
| 4TMP     | MLLT3                                                              | H3.3K9ac                                                   |
| 5JLB     | SETD2                                                              | H3.3 mutant K36I                                           |

**S. Table 5. Table of PDB files utilized for structural location computation of the variants**
